# Supplementary material for: Fermentation of Date Pulp Residues Using Saccharomyces cerevisiae and Pichia kudriavzevii—Insights into Biological Activities, Phenolic and Volatile Compounds, Untargeted Metabolomics, and Carbohydrate Analysis Post In Vitro Digestion
Source: MDPI journal article supplement (doi:10.3390/fermentation9060561), 2023-06-12
Supplement: s1 [file s1]

## Supplementary Materials

### **Fermentation of Date Pulp Residues Using *Saccharomyces cerevisiae* and *Pichia kudriavzevii* - Insights into Biological Activities, Phenolic and Volatile Compounds, Untargeted Metabolomics, and Carbohydrate Analysis post in vitro Digestion**

**Nadia S. Alkalbani <sup>1</sup>, Muneeba Zubair Alam <sup>1</sup>, Anas Al-Nabulsi <sup>2</sup>, Tareq M. Osaili <sup>2,3</sup>, Amin Olaimat <sup>4</sup>, Shao-Quan Liu <sup>5</sup>, Afaf Kamal-Eldin <sup>1</sup> and Mutamed Ayyash <sup>1,\*</sup>**

<sup>1</sup> Department of Food Science, College of Agriculture and Veterinary Medicine, United Arab Emirates University (UAEU), Al Ain P.O. Box 15551, United Arab Emirates; 950223010@uaeu.ac.ae (N.S.A.); 201890043@uaeu.ac.ae (M.Z.A.); afaf.kamal@uaeu.ac.ae (A.K.-E.)

<sup>2</sup> Department of Nutrition and Food Technology, Jordan University of Science and Technology, Irbid 21121, Jordan; anas\_nabulsi@just.edu.jo (A.A.-N.); tosaili@sharjah.ac.ae (T.M.O.)

<sup>3</sup> Department Clinical Nutrition and Dietetics, University of Sharjah, Sharjah P.O. Box 27272, United Arab Emirates

<sup>4</sup> Department of Clinical Nutrition and Dietetics, Faculty of Applied Medical Sciences, The Hashemite University, Zarqa 13133, Jordan; aminolaimat@hu.edu.jo

<sup>5</sup> Department of Food Science and Technology, Faculty of Science, National University of Singapore, Science Drive 2, Singapore 117542, Singapore; fstlsq@nus.edu.sg

\* Correspondence: mutamed.ayyash@uaeu.ac.ae

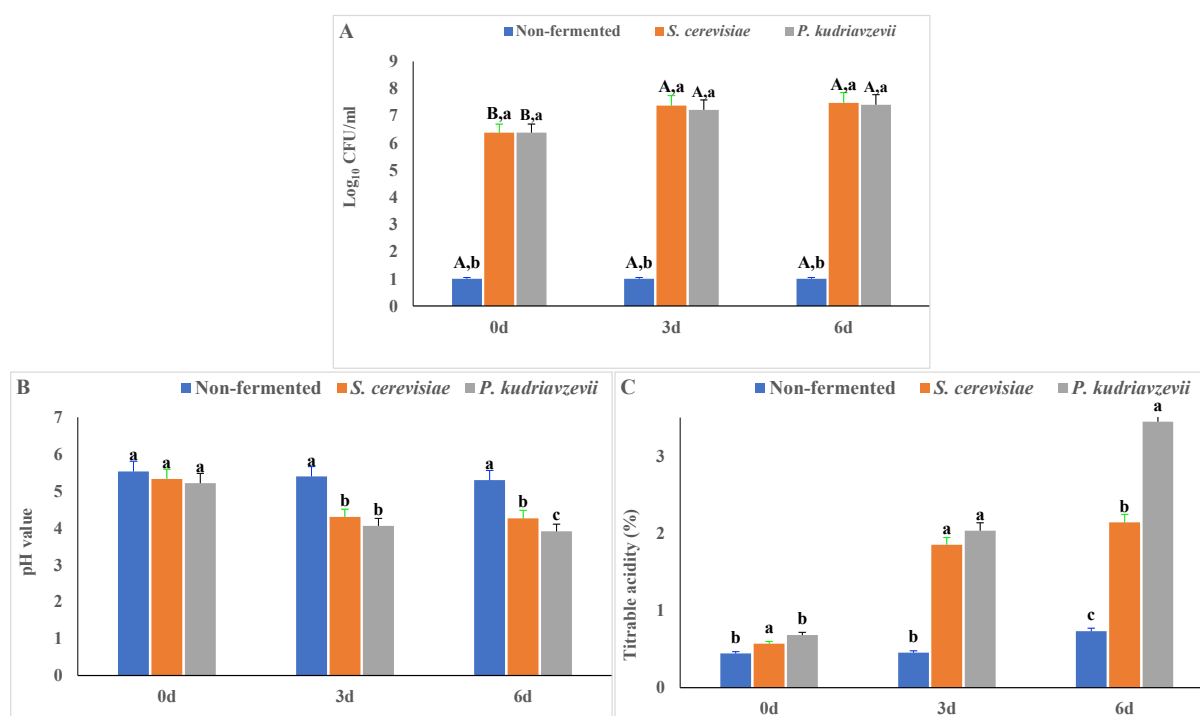

Figure S1. Yeast strains proliferation (A), pH (B) and titratable acidity (C) of the non-fermented and fermented date pomace by *S. cerevisiae* and *P. kudriavzevii* during at 25 °C for 6 days. Values are the mean values (n=3). Error bars express standard deviations.

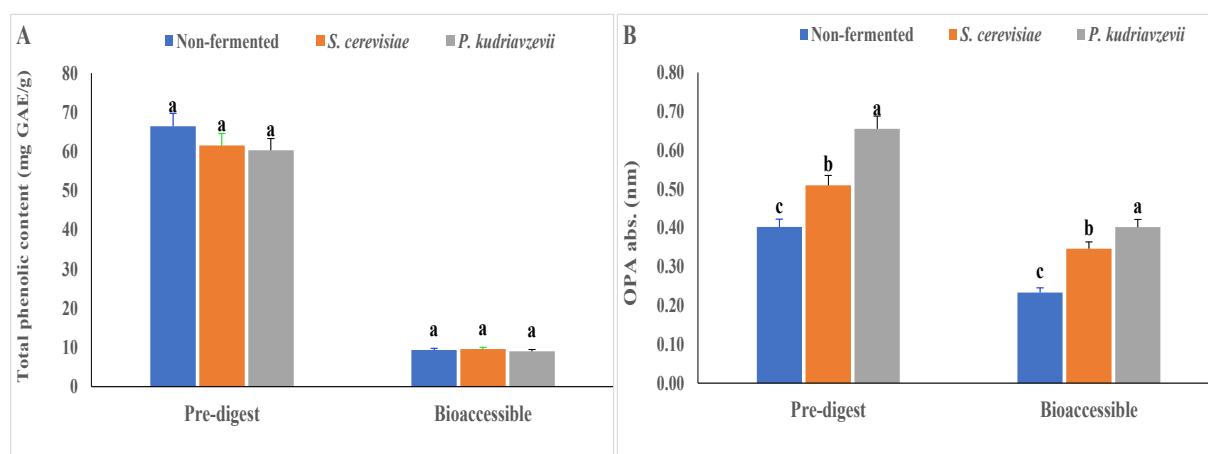

Figure S2. Total phenolic compounds (A) and OPA absorbances (B) of undigested samples and bioaccessible portion of non-fermented (control) and fermented date pomace by *S. cerevisiae* and *P. kudriavzevii*. Values are mean values (n=3). Values are the mean values (n=3). Error bars express standard deviations.

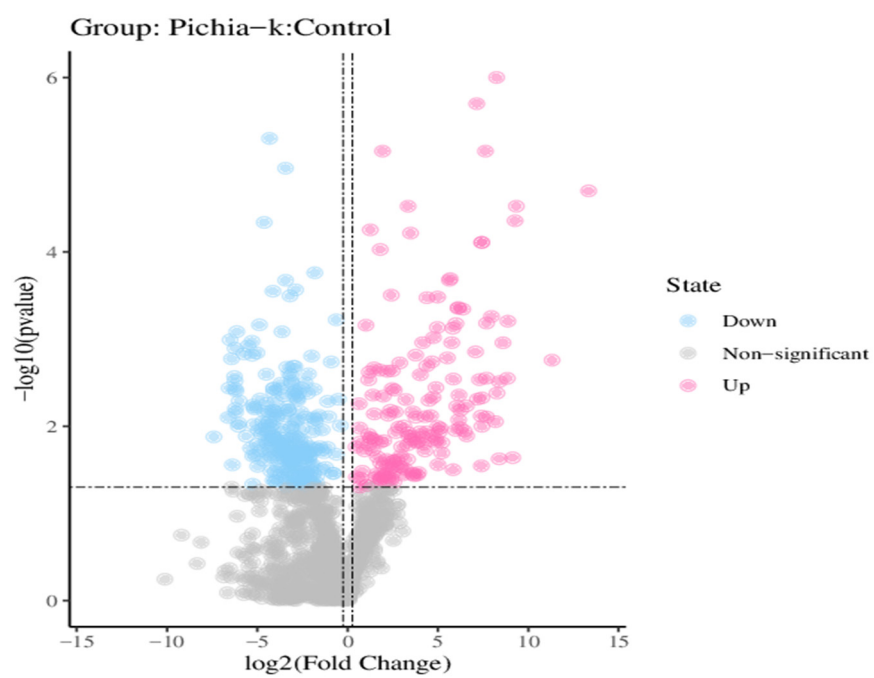

Figure S3. A volcano map displays the differential metabolites between non-fermented and fermented date palm pomace by *P. kudriavzevii*.

Table S1. Relative peak area (RPA%) and peak areas ( $\times 10^5$ ) of main volatile compounds in non-fermented (control) and fermented date pomace by *S. cerevisiae* and *P. kudriavzevii*

| Aromatized (control) and fermented date pomace by <i>S. cerevisiae</i> and <i>P. kudriavzevii</i> |       |                      |       |                        |       |           |       |
|---------------------------------------------------------------------------------------------------|-------|----------------------|-------|------------------------|-------|-----------|-------|
|                                                                                                   |       | <i>S. cerevisiae</i> |       | <i>P. kudriavzevii</i> |       | Control   |       |
| Compounds                                                                                         | RT    | Peak Area            |       | Peak Area              |       | Peak Area |       |
| Acids                                                                                             |       |                      |       |                        |       |           |       |
| 4-Methyl-2-oxovaleric acid                                                                        | 19.67 | 0.15                 | 0.05  | 0.00                   | 0.00  | 0.00      | 0.00  |
| Acetic acid                                                                                       | 19.76 | 1.68                 | 0.23  | 2.10                   | 0.31  | 1.42      | 0.23  |
| Isobutanoic acid                                                                                  | 22.60 | 0.14                 | 0.02  | 0.41                   | 0.07  | 0.06      | 0.02  |
| Butanoic acid                                                                                     | 24.09 | 0.10                 | 0.02  | 0.06                   | 0.01  | 0.03      | 0.01  |
| 2-Methylbutanoic acid                                                                             | 25.03 | 0.10                 | 0.02  | 0.59                   | 0.10  | 0.12      | 0.02  |
| Hexanoic acid                                                                                     | 28.92 | 1.29                 | 0.11  | 0.22                   | 0.01  | 0.06      | 0.03  |
| Heptanoic acid                                                                                    | 31.13 | 0.13                 | 0.00  | 0.10                   | 0.02  | 0.12      | 0.02  |
| Octanoic acid                                                                                     | 33.24 | 1.17                 | 0.17  | 0.26                   | 0.09  | 0.12      | 0.01  |
| Nonanoic acid                                                                                     | 35.27 | 0.52                 | 0.24  | 0.72                   | 0.26  | 0.17      | 0.05  |
| Benzoic acid                                                                                      | 40.21 | 0.11                 | 0.06  | 0.08                   | 0.01  | 0.03      | 0.02  |
| Subtotal                                                                                          |       | 5.40                 |       | 4.55                   |       | 2.14      |       |
| RPA (%)                                                                                           |       | 1.26                 |       | 1.60                   |       | 1.92      |       |
| Alcohols                                                                                          |       |                      |       |                        |       |           |       |
| Isobutanol                                                                                        | 9.63  | 1.69                 | 0.24  | 2.53                   | 0.29  | 0.00      | 0.00  |
| Isoamyl alcohol                                                                                   | 12.95 | 38.26                | 9.23  | 30.21                  | 2.50  | 7.74      | 1.28  |
| 1-Hexanol                                                                                         | 17.16 | 0.24                 | 0.11  | 0.17                   | 0.10  | 0.27      | 0.04  |
| 2-Ethyl-1-hexanol                                                                                 | 21.02 | 1.29                 | 0.39  | 0.79                   | 0.10  | 0.94      | 0.46  |
| 2-Phenylethanol                                                                                   | 30.95 | 134.23               | 15.35 | 46.97                  | 4.58  | 2.85      | 1.59  |
| 2-Furanmethanol                                                                                   | 25.18 | 0.10                 | 0.01  | 0.07                   | 0.01  | 0.13      | 0.03  |
| Subtotal                                                                                          |       | 175.82               |       | 80.74                  |       | 11.94     |       |
| RPA (%)                                                                                           |       | 40.99                |       | 28.33                  |       | 10.72     |       |
| Aldehydes                                                                                         |       |                      |       |                        |       |           |       |
| Benzaldehyde                                                                                      | 21.97 | 2.06                 | 0.79  | 5.95                   | 1.78  | 0.14      | 0.05  |
| Benzeneacetaldehyde                                                                               | 24.82 | 0.56                 | 0.16  | 0.27                   | 0.02  | 0.18      | 0.07  |
| 4-Methylbenzaldehyde                                                                              | 25.09 | 0.14                 | 0.03  | 0.14                   | 0.02  | 0.00      | 0.00  |
| 2,4-Dimethylbenzaldehyde                                                                          | 28.88 | 1.87                 | 0.08  | 1.60                   | 0.85  | 0.17      | 0.01  |
| Subtotal                                                                                          |       | 4.64                 |       | 7.96                   |       | 0.49      |       |
| RPA (%)                                                                                           |       | 1.08                 |       | 2.79                   |       | 0.44      |       |
| Esters                                                                                            |       |                      |       |                        |       |           |       |
| Ethyl acetate                                                                                     | 5.33  | 74.65                | 14.03 | 92.28                  | 27.27 | 36.19     | 14.57 |
| Ethyl propanoate                                                                                  | 6.33  | 1.76                 | 0.16  | 3.28                   | 0.26  | 1.50      | 0.16  |
| Isoamyl acetate                                                                                   | 9.97  | 0.61                 | 0.26  | 1.17                   | 0.20  | 0.00      | 0.00  |
| tert-Butyl formate                                                                                | 15.96 | 0.03                 | 0.01  | 0.03                   | 0.01  | 0.04      | 0.00  |
| Ethyl octanoate                                                                                   | 19.07 | 0.13                 | 0.01  | 0.00                   | 0.00  | 0.00      | 0.00  |
| Ethyl decanoate                                                                                   | 24.26 | 0.07                 | 0.01  | 0.00                   | 0.00  | 0.00      | 0.00  |

|                   |              |              |              |      |      |      |      |
|-------------------|--------------|--------------|--------------|------|------|------|------|
| Phenethyl acetate | 28.53        | 0.52         | 0.13         | 0.52 | 0.19 | 0.22 | 0.03 |
| Methyl salicylate | 27.93        | 0.14         | 0.05         | 0.08 | 0.01 | 0.08 | 0.00 |
| <b>Subtotal</b>   | <b>77.90</b> | <b>97.36</b> | <b>38.02</b> |      |      |      |      |
| <b>RPA (%)</b>    | <b>18.16</b> | <b>34.16</b> | <b>34.14</b> |      |      |      |      |

#### Ketones

|                       |             |             |             |      |      |      |      |
|-----------------------|-------------|-------------|-------------|------|------|------|------|
| Acetone               | 4.73        | 1.30        | 0.27        | 2.19 | 1.02 | 3.86 | 0.75 |
| 2-Methyl-3-thiolanone | 21.86       | 0.03        | 0.00        | 0.00 | 0.00 | 0.00 | 0.00 |
| Butyrolactone         | 24.71       | 0.03        | 0.01        | 0.03 | 0.00 | 0.00 | 0.00 |
| <b>Subtotal</b>       | <b>1.37</b> | <b>2.22</b> | <b>3.86</b> |      |      |      |      |
| <b>RPA (%)</b>        | <b>0.32</b> | <b>0.78</b> | <b>3.47</b> |      |      |      |      |

#### Phenols

|                                  |              |              |              |       |      |       |      |
|----------------------------------|--------------|--------------|--------------|-------|------|-------|------|
| 2,4-Di- <i>tert</i> -butylphenol | 37.88        | 78.89        | 12.22        | 61.03 | 7.14 | 46.24 | 9.30 |
| 2-Acetyl-4-methylphenol          | 36.24        | 0.10         | 0.02         | 0.00  | 0.00 | 0.00  | 0.00 |
| <i>t</i> -Butylhydroquinone      | 62.17        | 0.12         | 0.02         | 0.10  | 0.02 | 0.09  | 0.02 |
| Guaiacol                         | 29.59        | 0.02         | 0.00         | 0.01  | 0.00 | 0.01  | 0.01 |
| <b>Subtotal</b>                  | <b>79.13</b> | <b>61.14</b> | <b>46.35</b> |       |      |       |      |
| <b>RPA (%)</b>                   | <b>18.45</b> | <b>21.45</b> | <b>41.62</b> |       |      |       |      |

#### Others

|                                            |              |              |             |         |       |        |       |
|--------------------------------------------|--------------|--------------|-------------|---------|-------|--------|-------|
| Dimethyl ether                             | 5.960        | 84.23        | 41.32       | 30.60   | 12.57 | 8.05   | 3.15  |
| 2-Acetylfuran                              | 21.469       | 0.11         | 0.03        | 0.11    | 0.00  | 0.13   | 0.01  |
| 1 <i>H</i> -Indene, octahydro-             |              | 0.03         | 0.003       | 0.16398 | 0.052 | 0.1772 | 0.044 |
| 2,2,4,4,7,7-hexamethyl-,<br><i>trans</i> - | 26.735       |              |             |         |       |        |       |
| Naphthalene                                | 27.214       | 0.18         | 0.01        | 0.10    | 0.02  | 0.11   | 0.04  |
| Isobutyric anhydride                       | 29.685       | 0.05         | 0.01        | 0.02    | 0.01  | 0.02   | 0.01  |
| 1-Phenylpropane-1,2-diol                   | 30.156       | 0.03         | 0.00        | 0.02    | 0.00  | 0.02   | 0.00  |
| 3-Acetyl-1 <i>H</i> -pyrroline             | 31.938       | 0.05         | 0.01        | 0.04    | 0.01  | 0.05   | 0.00  |
| <b>Subtotal</b>                            | <b>84.69</b> | <b>31.06</b> | <b>8.56</b> |         |       |        |       |
| <b>RPA (%)</b>                             | <b>19.74</b> | <b>10.90</b> | <b>7.69</b> |         |       |        |       |

|              |               |               |               |  |  |  |  |
|--------------|---------------|---------------|---------------|--|--|--|--|
| <b>Total</b> | <b>428.94</b> | <b>285.03</b> | <b>111.36</b> |  |  |  |  |
|--------------|---------------|---------------|---------------|--|--|--|--|

Value = mean±standard deviation (SD), n=3

RPA (%) = (Base peak area/total) × 100

Table S2. Top 10 enriched metabolic pathways with identified metabolites.

| Pathway                         | KEGG Names                                                                                                                                                                                                                                                                                                              |
|---------------------------------|-------------------------------------------------------------------------------------------------------------------------------------------------------------------------------------------------------------------------------------------------------------------------------------------------------------------------|
| 2-Oxocarboxylic acid metabolism | L-Glutamic acid<br>Oxoglutaric acid<br>L-Methionine<br>L-Isoleucine<br>L-Tryptophan<br>2-Isopropylmalic acid<br>(-)-threo-isodihomocitric acid<br>L-(+)-Valine<br>(1 <i>E</i> )- <i>N</i> -Hydroxy-4-(methylsulfanyl)-1-butanamine<br>4-Methylthiobutylthiohydroximate<br>( <i>E</i> )-5-(methylsulfanyl)pentanal oxime |
| Biosynthesis of amino acids     | L-Glutamic acid<br>Oxoglutaric acid<br>L-Arginine<br>L-Methionine<br>L-Isoleucine<br>L-Tryptophan<br>2-Isopropylmalic acid<br>Shikimate<br>D-(-)-3-Phosphoglyceric acid<br>L-(+)-Valine                                                                                                                                 |
| ABC transporters                | L-Glutamic acid<br>L-Arginine<br>L-Isoleucine<br>α-Lactose<br>Xylitol<br>1,4-D-xylobiose<br>Glycerin<br>L-(+)-Valine<br>Phthalic acid                                                                                                                                                                                   |
| Aminoacyl-tRNA biosynthesis     | L-Glutamic acid<br>L-arginine<br>L-Methionine<br>L-Isoleucine<br>L-Tryptophan<br>L-(+)-Valine                                                                                                                                                                                                                           |
| Glucosinolate biosynthesis      | L-Methionine<br>L-Isoleucine<br>L-Tryptophan<br>L-(+)-Valine<br>(1 <i>E</i> )- <i>N</i> -Hydroxy-4-(methylsulfanyl)-1-butanamine<br>4-Methylthiobutylthiohydroximate<br>( <i>E</i> )-5-(methylsulfanyl)pentanal oxime                                                                                                   |
| Tryptophan metabolism           | L-Tryptophan<br>4-Hydroxy-2-quinolinecarboxylic acid                                                                                                                                                                                                                                                                    |

|                                          |                                                                                                                       |
|------------------------------------------|-----------------------------------------------------------------------------------------------------------------------|
|                                          | Indole-3-acetic acid<br>Indole-3-ethanol<br>Skatole<br>Indole<br>5-(3'-carboxy-3'-oxopropyl) -4,6-dihydroxypicolinate |
| Butanoate metabolism                     | ( <i>R</i> )-Malate<br>L-Glutamic acid<br>Oxoglutaric acid<br>Diacetyl<br>(+/-)-2-Hydroxyglutaric acid                |
| Plant hormone signal transduction        | N6-( <i>delta</i> -2-isopentenyl)-adenine<br>Indole-3-acetic acid<br>Salicylic acid                                   |
| Pentose and glucuronate interconversions | Oxoglutaric acid<br>L-arabitol<br>Ribitol<br>Xylitol<br>Glycerin                                                      |
| C5-Branched dibasic acid metabolism      | Itaconate<br>L-Glutamic acid<br>Oxoglutaric acid<br>(+/-)-2-Hydroxyglutaric acid                                      |
